# Supplementary material for: Virus Replication Strategies and the Critical CTL Numbers Required for the Control of Infection
Source: PLOS journal article supplement (doi:10.1371/journal.pcbi.1002274), 2011-11-17
Supplement: S2 (10.1371/journal.pcbi.1002274.s002) [file journal.pcbi.1002274.s002]

301 Moved Permanently

# Moved Permanently

The document has moved here.

---

Apache Server at www.ploscompbiol.org Port 80
