# Supplementary material for: Virus Replication Strategies and the Critical CTL Numbers Required for the Control of Infection
Source: PLOS journal article supplement (doi:10.1371/journal.pcbi.1002274), 2011-11-17
Supplement: S2 (10.1371/journal.pcbi.1002274.s002) [file journal.pcbi.1002274.s002]

## Text S2: Modeling CTL killing with handling time and virus epitope dynamics

The models we study in this paper are instances of a more general model of the interactions between CTL and infected cells structured with respect to their age since infection. The model is illustrated in the figure and described below.

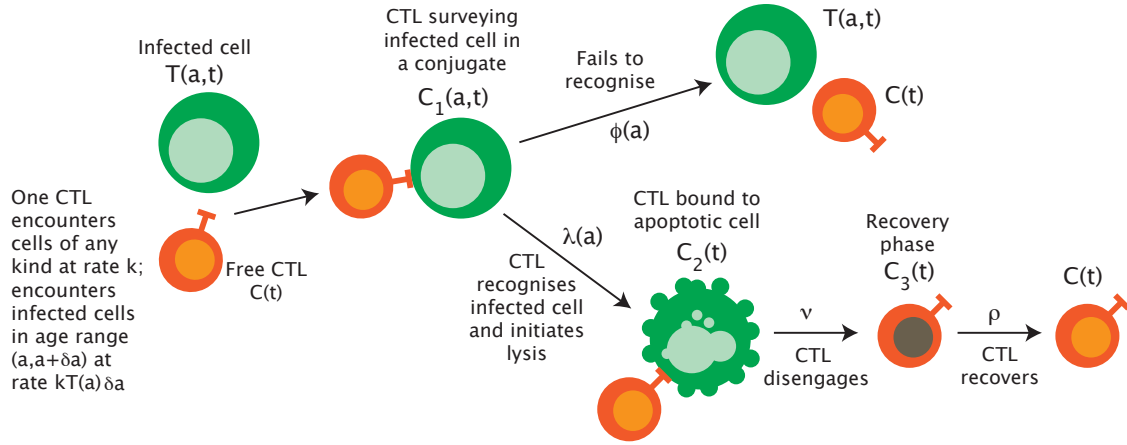

**Figure 1.** A model of CTL killing incorporating (i) the efficiency of detection of infected cells as a function of age since infection, and (ii) the time taken for CTL to lyse their targets.

$$\frac{\partial T}{\partial t} + \frac{\partial T}{\partial a} = - (kC(t) + \mu(a))T(a, t) + \phi(a)C_1(a, t) \quad (1)$$

$$T(a = 0, t) = \epsilon \int_0^\infty m(a)T(a, t) da \quad (2)$$

$$\frac{dC}{dt} = \rho C_3(t) + \int_0^\infty \{(\mu(a) + \phi(a))C_1(a, t) - kC(t)T(a, t)\} da \quad (3)$$

$$\frac{\partial C_1}{\partial t} + \frac{\partial C_1}{\partial a} = kC(t)T(a, t) - (\mu(a) + \phi(a) + \lambda(a))C_1(a, t) \quad (4)$$

$$\frac{dC_2}{dt} = \int_0^\infty \lambda(a)C_1(a, t) da - \nu C_2(t) \quad (5)$$

$$\frac{dC_3}{dt} = \nu C_2(t) - \rho C_3(t) \quad (6)$$

The populations  $T$ ,  $C$ ,  $C_1$ ,  $C_2$  and  $C_3$  are defined as follows.  $T(a, t)$  is the population density of infected cells of age  $a$  in the tissue, such that  $\int_a^{a+\delta a} T(a, t) da$  is the density of cells at time  $t$  with an age since infection in the range  $(a, a + \delta a)$ ; the total density of infected cells is  $\int_0^\infty T(a, t) da \in [0, 1]$ .  $C(t) \in [0, 1]$  is the density of free CTL;  $C_1(a, t)$  is the density of CTL that are conjugated to live cells

of infection age  $a$  and surveying them, such that  $\int C_1(a, t) da \in [0, 1]$ ;  $C_2(t) \in [0, 1]$  is the density of CTL conjugated to infected cells during lysis; and  $C_3(t) \in [0, 1]$  is the density of CTL recently disengaged from a lytic event but unable to kill.

The parameters are defined as follows:

- $k$  is the rate that a CTL moves between cells, such that  $1/k$  is the expected time to a CTL's next encounter with any cell, and  $(k \int T(a, t) da)^{-1}$  is the expected time to a given CTL's next encounter with an infected cell of any age.
- $\mu(a)$  is the age-dependent rate of loss of cells due to non-CTL mediated mechanisms such as natural mortality and viral cytopathicity.
- $m(a)$  is the rate of production of virions by an infected cell at age  $a$  after infection.
- $\epsilon$  is the mean number of infected cells arising from a single virion.
- $\phi(a)$  is the rate at which a CTL conjugated with an infected cell of age  $a$  disengages without lysis.
- $\lambda(a)$  is the rate at which, following an encounter, a CTL successfully identifies an infected cell of age  $a$  and begins the process of lysis.
- $\nu$  is the rate at which a CTL disengages from an apoptotic cell; so  $1/\nu$  is the mean time a CTL spends attached to a cell following the initiation of lysis.
- $\rho$  is the rate at which a disengaged CTL recovers and again becomes able to detect infected cells.

Implicit in the equations above is a quasi-steady state assumption for the dynamics of free virus, and the assumption that susceptible cells are in abundance. We assume that free virus has a very short half-life in the extracellular space and so the rate of infection is directly proportional to the total rate of virus production.

The first model in the text (eqns. 4-6) derives from this model as follows. All quantities are independent of the age since infection,  $a$ ; CTL recognise infected cells immediately following encounter ( $\phi = 0$  and  $\lambda = \infty$ ); there is no natural mortality of infected cells ( $\mu = 0$ ) and no spread of infection from cell to cell ( $m = \epsilon = 0$ ); CTL-infected cell conjugates break up at rate  $\nu$ , and CTL recovery is assumed to be included in this process ( $\rho = \infty$ ).

The second model (eqns. 13 and 14) derives from it as follows. Following a CTL's encounter with an infected cell of age  $a$ , it is recognised as infected with probability  $p(a) \equiv \lambda(a)/(\lambda(a) + \phi(a))$ , killed instantly ( $\lambda(a) \rightarrow \infty$  and  $\phi(a) \rightarrow \infty$  such that  $p(a)$  is invariant; and  $\nu = \infty$ ) and the CTL recovers instantly ( $\rho = \infty$ ). This yields the age-specific rate of surveillance  $k(a) = p(a)k$ .
