# Supplementary material for: Virus Replication Strategies and the Critical CTL Numbers Required for the Control of Infection
Source: PLoS Comput Biol. 2011 Nov 17;7(11):e1002274. doi: 10.1371/journal.pcbi.1002274 (PMC3219614; doi:10.1371/journal.pcbi.1002274)
Supplement: Text S3 — Derivation of the Lotka-Euler equation. Derivation of equation (16) for the growth rate of a population of infected cells with a steady-state distribution of times since infection. (PDF) [file pcbi.1002274.s003.pdf]

### Text S3: Derivation of the Lotka-Euler equation

The Lotka-Euler equation (Equation 16) can be derived as follows. The total number of infected cells in age class  $a$  at time  $t$  is the cells that were infected a time  $a$  ago and survived to age  $a$ ;

$$I(a, t) = \ell(a)I(0, t - a) = \epsilon \ell(a) \int_{s=0}^{\infty} I(s, t - a) m(s) ds$$

We are assuming steady state exponential growth of infected cells in all age-classes,  $I(a, t) = e^{rt} I(a, 0)$ , so

$$\begin{aligned} I(a, t) &= \epsilon \ell(a) \int_{s=0}^{\infty} I(s, t) e^{-ra} m(s) ds \\ &= \epsilon \ell(a) e^{-ra} \int_{s=0}^{\infty} I(s, t) m(s) ds \end{aligned}$$

The total rate of virus production at time  $t$  is then

$$\int_a I(a, t) m(a) da = \epsilon \int_a m(a) \ell(a) e^{-ra} da \int_s I(s, t) m(s) ds$$

which gives Equation 16 in the main text.
